# Supplementary material for: Human ex vivo spinal cord slice culture as a useful model of neural development, lesion, and allogeneic neural cell therapy
Source: PubMed Central journal article supplement (PMC7390865; doi:10.1186/s13287-020-01771-y), 2020-07-29

# Supplementary figure 1:

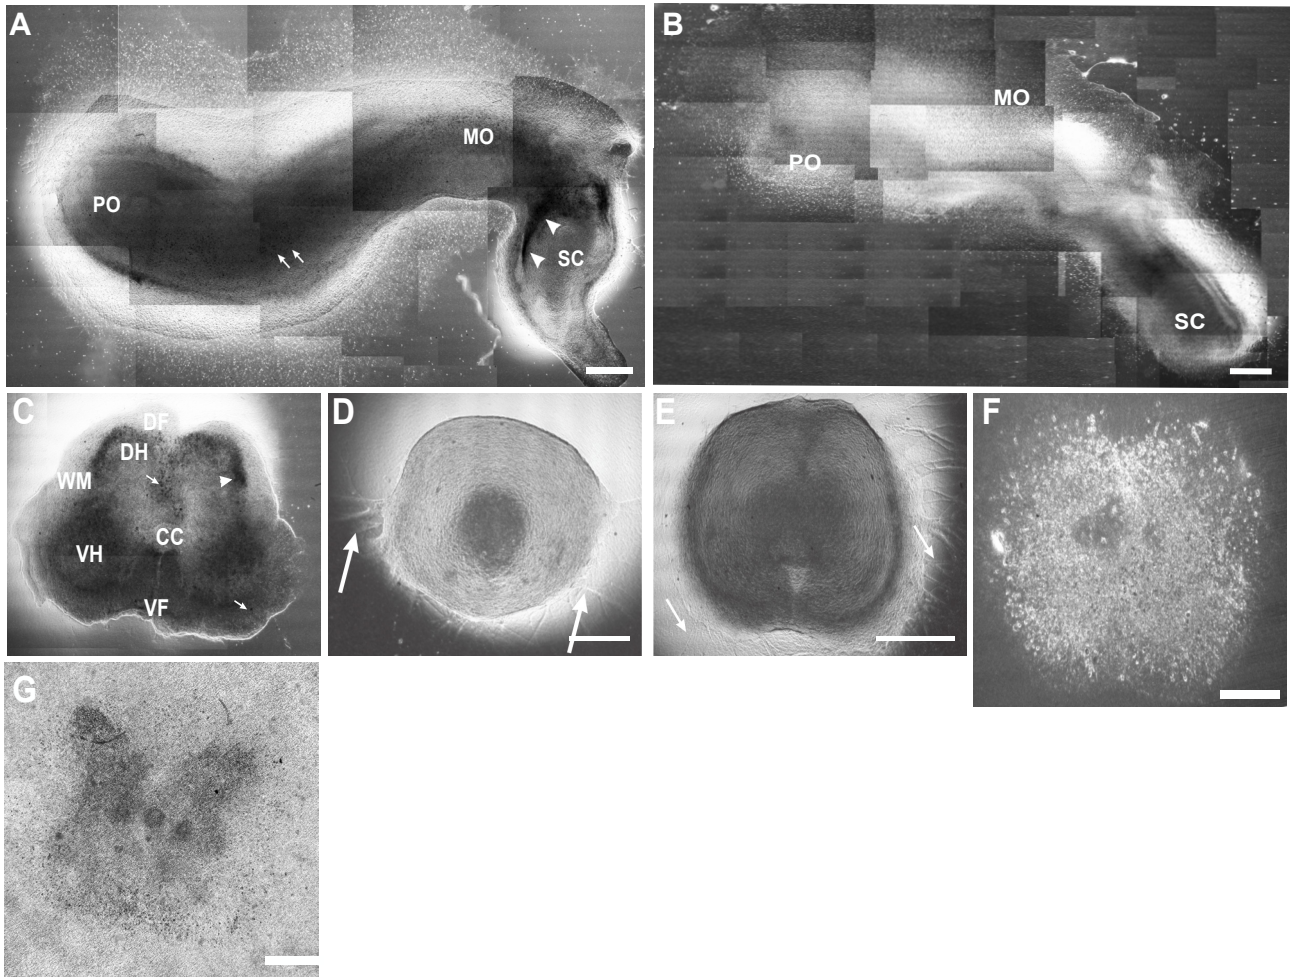

## Supplementary figure 2:

- 5-6.5 w
- 7-8.5 w
- ▲ 9-10.5 w

**A**

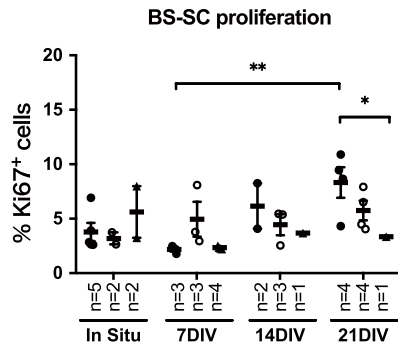

**B**

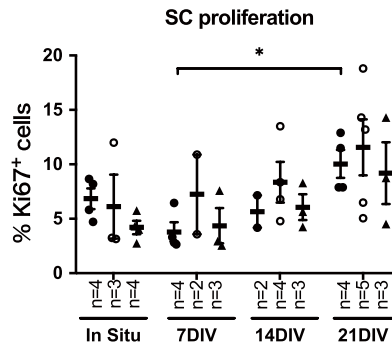

**C**

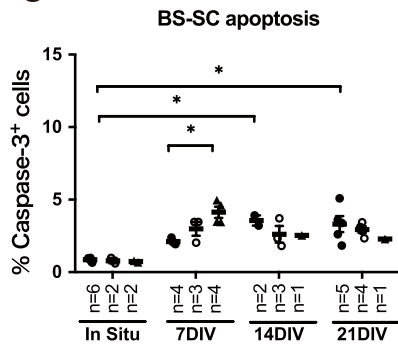

**D**

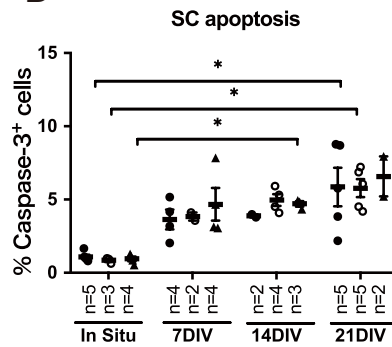

**E**

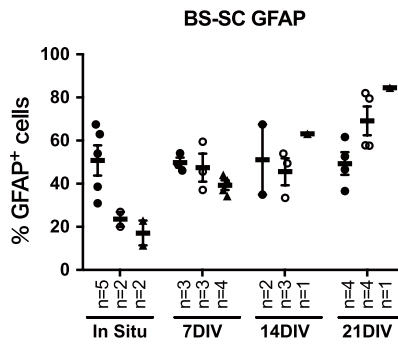

**F**

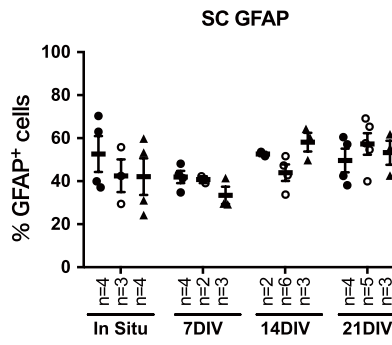

**G**

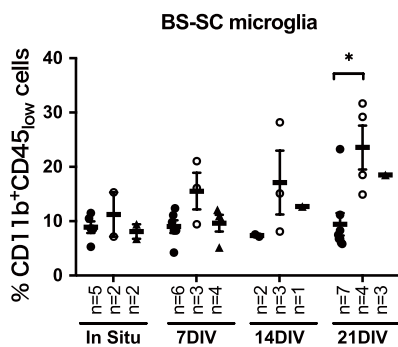

**H**

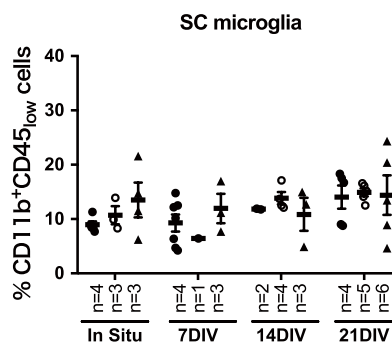

### Supplementary figure 3:

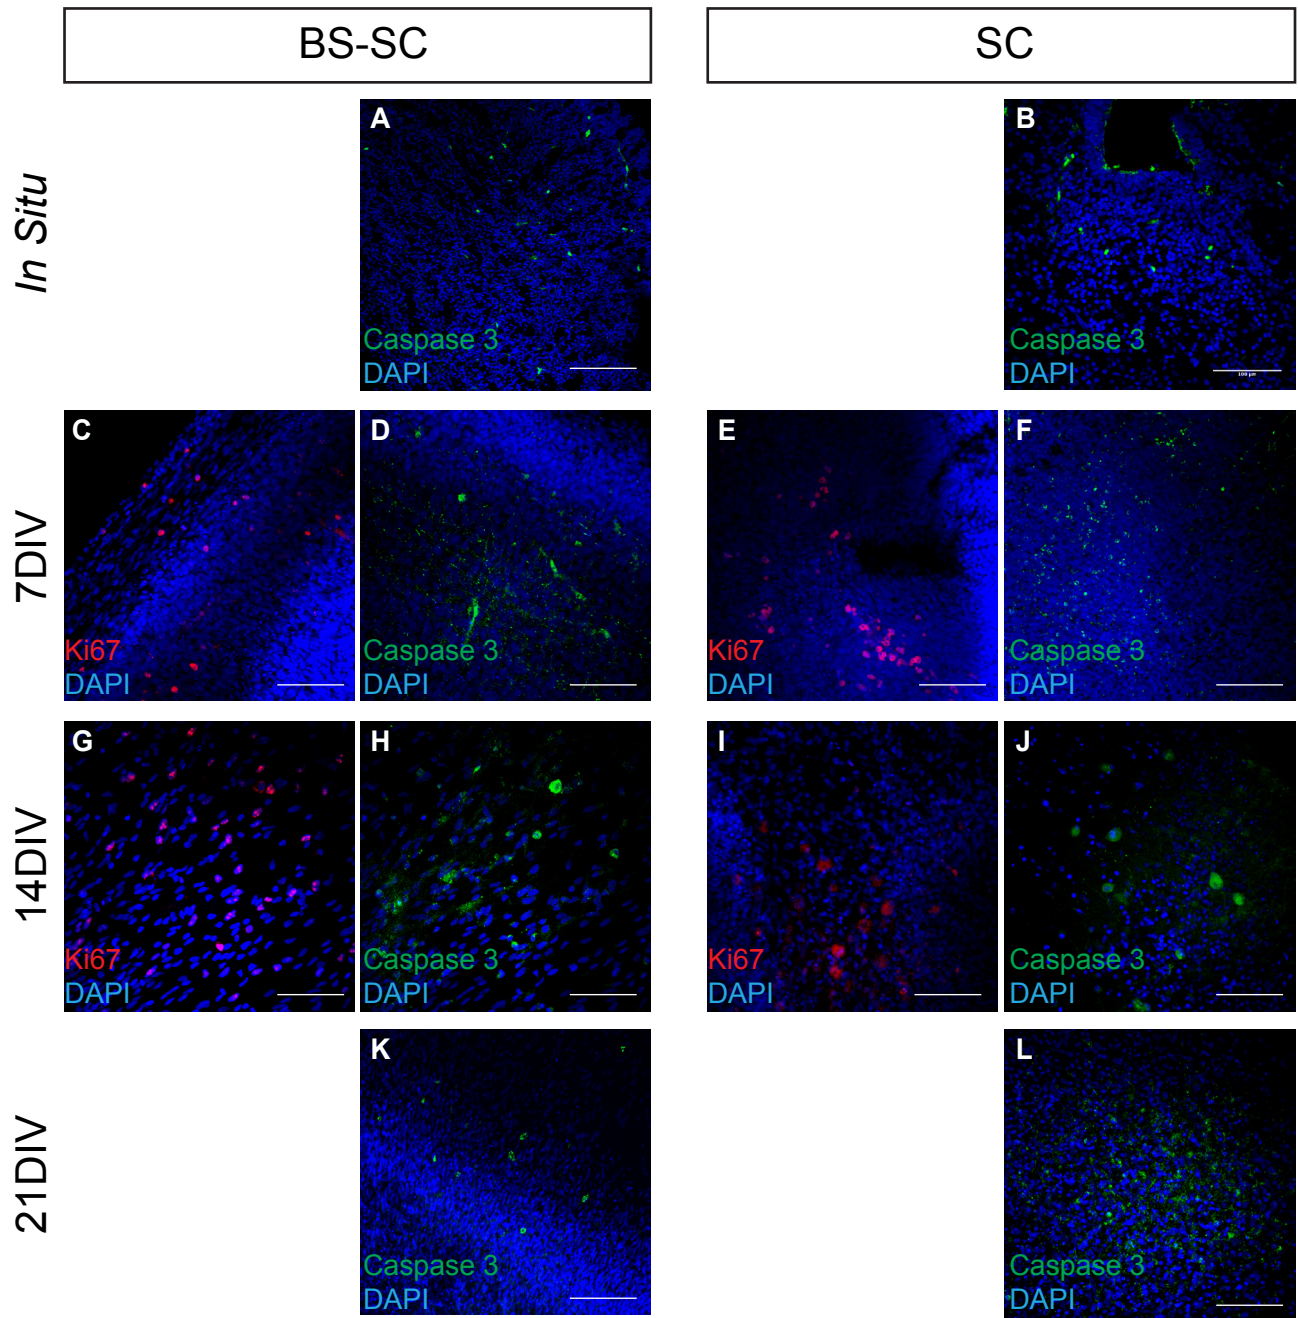

# Supplementary figure 4:

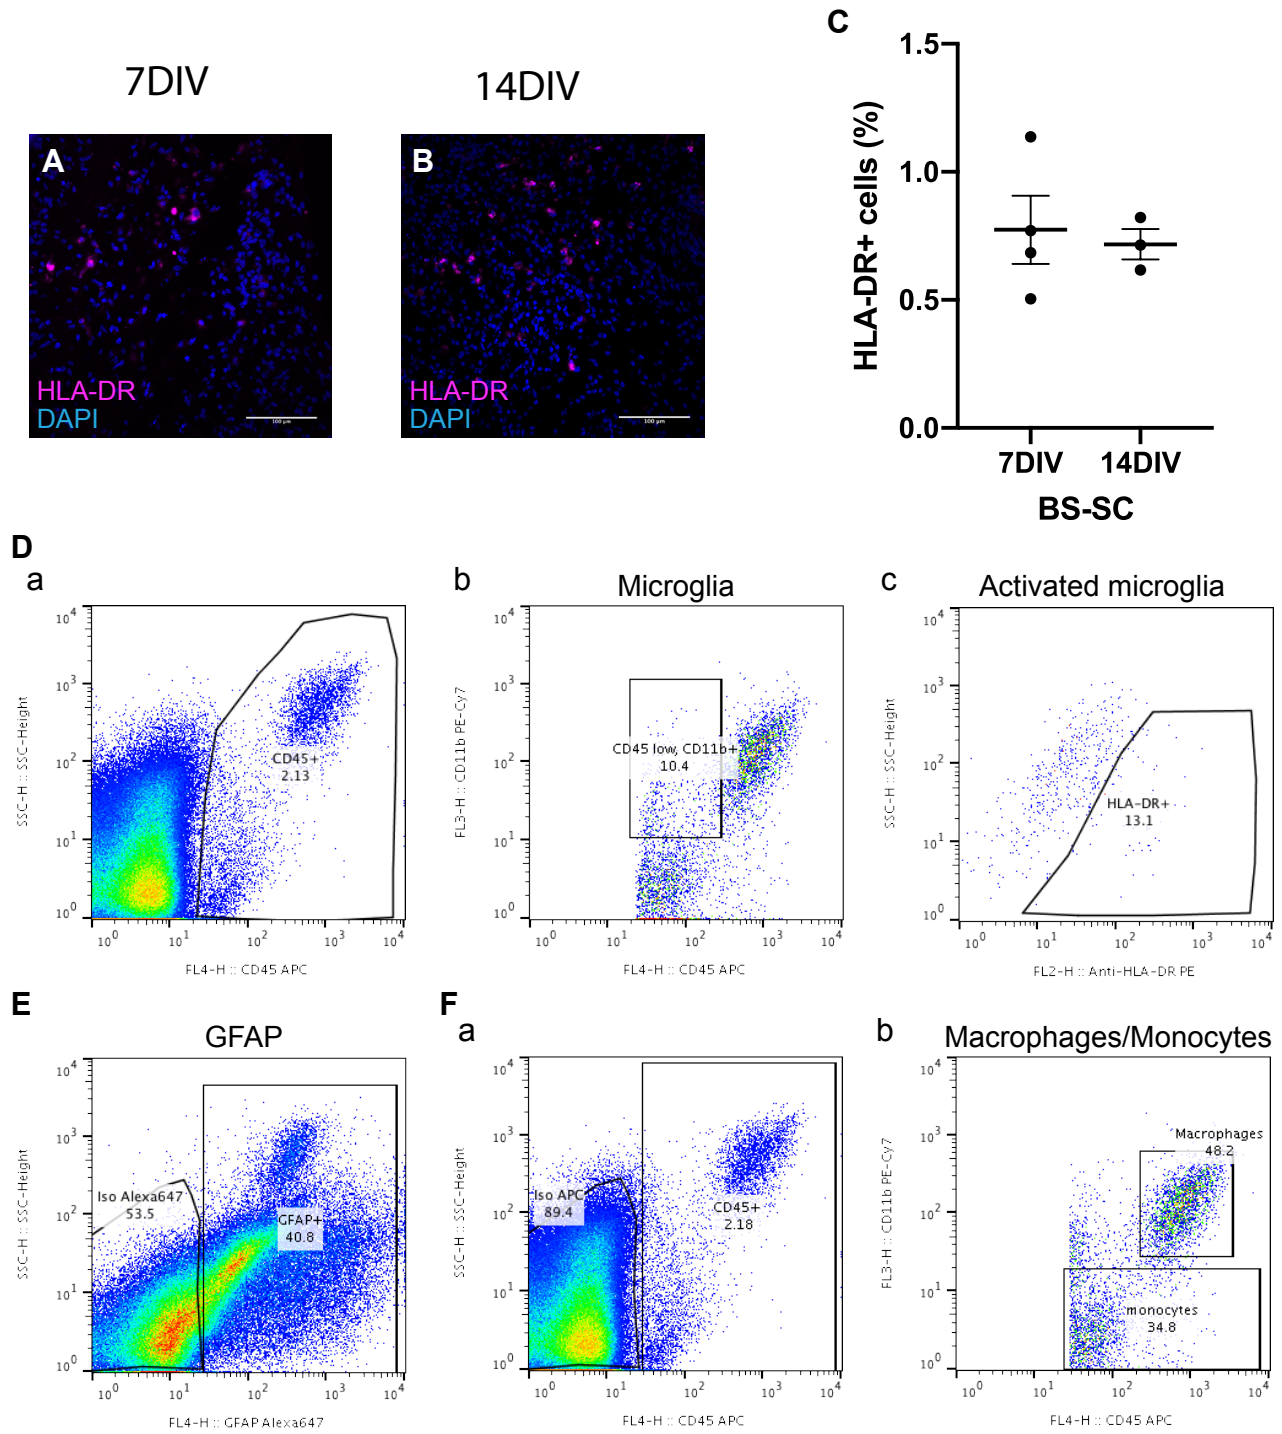



# Supplementary figure 5:

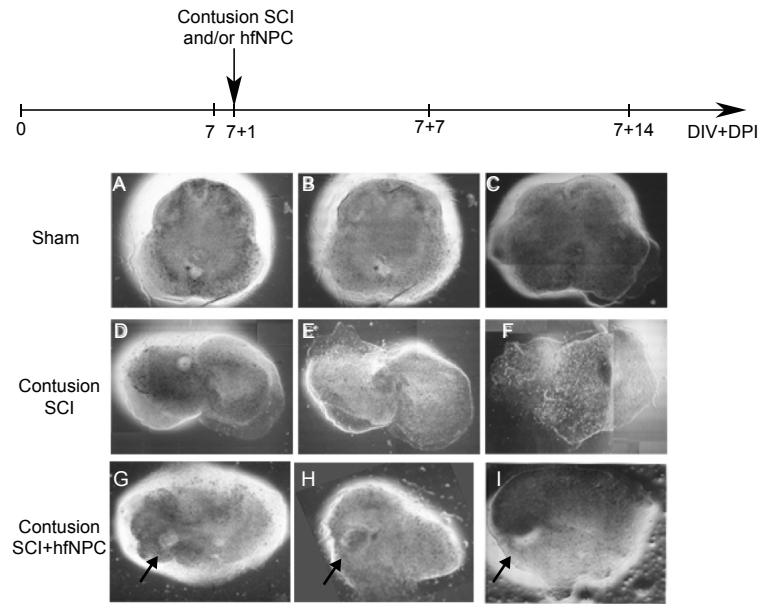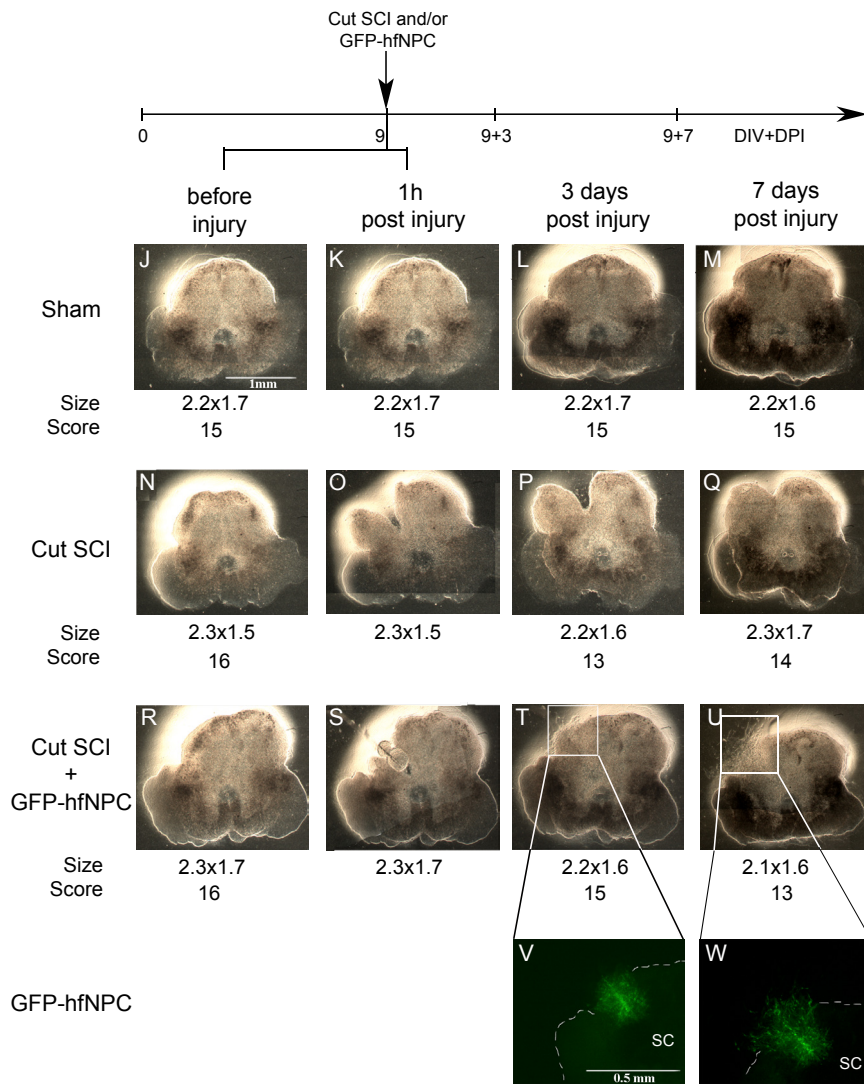

Supplement: 13287_2020_1771_MOESM3_ESM.pdf [file 13287_2020_1771_MOESM3_ESM.pdf]
